# Supplementary material for: Genome-wide analysis of DNA methylation in Hirschsprung enteric precursor cells: unraveling the epigenetic landscape of enteric nervous system development
Source: PubMed Central journal article supplement (PMC7942176; doi:10.1186/s13148-021-01040-6), 2021-03-09
Supplement: 13148_2021_1040_MOESM3_ESM.pdf [file 13148_2021_1040_MOESM3_ESM.pdf]

**Supplementary file 3: Table 3. Top 20 enriched biological processes of the DMRs located according to different gene regions (1to5kb, promoters, exons, and introns).** % is the percentage of all the user-provided genes that are found in the given ontology term. Log<sub>10</sub>(P) is the p-value in log base 10. Log<sub>10</sub>(q) is the multi-test adjusted p-value in log base 10.

| 1to5kb | GO         | Category                | Description                                                      | %    | Log <sub>10</sub> (P) | Log <sub>10</sub> (q) |
|--------|------------|-------------------------|------------------------------------------------------------------|------|-----------------------|-----------------------|
| 1      | GO:0048598 | GO Biological Processes | embryonic morphogenesis                                          | 7.28 | -10.36                | -6.16                 |
| 2      | GO:0045664 | GO Biological Processes | regulation of neuron differentiation                             | 6.9  | -7.88                 | -3.99                 |
| 3      | GO:0048729 | GO Biological Processes | tissue morphogenesis                                             | 6.53 | -7.01                 | -3.29                 |
| 4      | GO:0007423 | GO Biological Processes | sensory organ development                                        | 5.6  | -6.01                 | -2.7                  |
| 5      | GO:0030155 | GO Biological Processes | regulation of cell adhesion                                      | 6.53 | -6                    | -2.7                  |
| 6      | GO:0007420 | GO Biological Processes | brain development                                                | 6.53 | -5.7                  | -2.64                 |
| 7      | GO:0048705 | GO Biological Processes | skeletal system morphogenesis                                    | 3.17 | -5.66                 | -2.64                 |
| 8      | GO:0007169 | GO Biological Processes | transmembrane receptor protein tyrosine kinase signaling pathway | 6.34 | -5.38                 | -2.46                 |
| 9      | GO:0035270 | GO Biological Processes | endocrine system development                                     | 2.24 | -5.27                 | -2.38                 |
| 10     | GO:0043068 | GO Biological Processes | positive regulation of programmed cell death                     | 5.97 | -5.25                 | -2.38                 |
| 11     | GO:0051493 | GO Biological Processes | regulation of cytoskeleton organization                          | 5.04 | -4.95                 | -2.25                 |
| 12     | GO:0060485 | GO Biological Processes | mesenchyme development                                           | 3.36 | -4.85                 | -2.19                 |

|                  |            |                         |                                                 |          |                 |                 |
|------------------|------------|-------------------------|-------------------------------------------------|----------|-----------------|-----------------|
| 13               | GO:0045665 | GO Biological Processes | negative regulation of neuron differentiation   | 2.8      | -4.49           | -1.95           |
| 14               | GO:0050808 | GO Biological Processes | synapse organization                            | 4.1      | -4.42           | -1.92           |
| 15               | GO:2000027 | GO Biological Processes | regulation of animal organ morphogenesis        | 2.99     | -4.41           | -1.92           |
| 16               | GO:0001101 | GO Biological Processes | response to acid chemical                       | 3.54     | -4.33           | -1.87           |
| 17               | GO:0007264 | GO Biological Processes | small GTPase mediated signal transduction       | 4.48     | -4.24           | -1.81           |
| 18               | GO:0043523 | GO Biological Processes | regulation of neuron apoptotic process          | 2.61     | -4.14           | -1.73           |
| 19               | GO:0007224 | GO Biological Processes | smoothened signaling pathway                    | 2.05     | -4.02           | -1.65           |
| 20               | GO:1901699 | GO Biological Processes | cellular response to nitrogen compound          | 5.22     | -4              | -1.64           |
| <b>Promoters</b> | <b>GO</b>  | <b>Category</b>         | <b>Description</b>                              | <b>%</b> | <b>Log10(P)</b> | <b>Log10(q)</b> |
| 1                | GO:0018958 | GO Biological Processes | phenol-containing compound metabolic process    | 2.69     | -5.69           | -1.5            |
| 2                | GO:0043524 | GO Biological Processes | negative regulation of neuron apoptotic process | 2.96     | -5.28           | -1.43           |
| 3                | GO:0048598 | GO Biological Processes | embryonic morphogenesis                         | 6.18     | -5.16           | -1.43           |
| 4                | GO:0030036 | GO Biological Processes | actin cytoskeleton organization                 | 6.72     | -4.97           | -1.37           |
| 5                | GO:0043065 | GO Biological Processes | positive regulation of apoptotic process        | 6.45     | -4.71           | -1.29           |
| 6                | GO:1901615 | GO Biological Processes | organic hydroxy compound metabolic process      | 5.65     | -4.68           | -1.29           |

|              |            |                         |                                                                            |          |                 |                 |
|--------------|------------|-------------------------|----------------------------------------------------------------------------|----------|-----------------|-----------------|
| 7            | GO:0002274 | GO Biological Processes | myeloid leukocyte activation                                               | 6.18     | -4.48           | -1.29           |
| 8            | GO:0007423 | GO Biological Processes | sensory organ development                                                  | 5.65     | -4.44           | -1.29           |
| 9            | GO:0000904 | GO Biological Processes | cell morphogenesis involved in differentiation                             | 6.45     | -4.09           | -1.09           |
| 10           | GO:2000147 | GO Biological Processes | positive regulation of cell motility                                       | 5.38     | -3.82           | -0.96           |
| 11           | GO:0017000 | GO Biological Processes | antibiotic biosynthetic process                                            | 1.08     | -3.81           | -0.96           |
| 12           | GO:1903827 | GO Biological Processes | regulation of cellular protein localization                                | 5.11     | -3.81           | -0.96           |
| 13           | GO:0030155 | GO Biological Processes | regulation of cell adhesion                                                | 6.18     | -3.8            | -0.96           |
| 14           | GO:0048705 | GO Biological Processes | skeletal system morphogenesis                                              | 2.96     | -3.59           | -0.85           |
| 15           | GO:0045647 | GO Biological Processes | negative regulation of erythrocyte differentiation                         | 0.81     | -3.58           | -0.85           |
| 16           | GO:0072273 | GO Biological Processes | metanephric nephron morphogenesis                                          | 1.08     | -3.44           | -0.84           |
| 17           | GO:0051345 | GO Biological Processes | positive regulation of hydrolase activity                                  | 6.18     | -3.44           | -0.84           |
| 18           | GO:0034330 | GO Biological Processes | cell junction organization                                                 | 3.49     | -3.43           | -0.84           |
| 19           | GO:0043434 | GO Biological Processes | response to peptide hormone                                                | 4.3      | -3.42           | -0.84           |
| 20           | GO:0002702 | GO Biological Processes | positive regulation of production of molecular mediator of immune response | 1.88     | -3.39           | -0.84           |
| <b>Exons</b> | <b>GO</b>  | <b>Category</b>         | <b>Description</b>                                                         | <b>%</b> | <b>Log10(P)</b> | <b>Log10(q)</b> |

|    |            |                         |                                                                  |      |       |       |
|----|------------|-------------------------|------------------------------------------------------------------|------|-------|-------|
| 1  | GO:0098742 | GO Biological Processes | cell-cell adhesion via plasma-membrane adhesion molecules        | 3.62 | -7.75 | -3.72 |
| 2  | GO:0007169 | GO Biological Processes | transmembrane receptor protein tyrosine kinase signaling pathway | 6.55 | -7.62 | -3.72 |
| 3  | GO:0007423 | GO Biological Processes | sensory organ development                                        | 5.43 | -7.29 | -3.69 |
| 4  | GO:0007264 | GO Biological Processes | small GTPase mediated signal transduction                        | 5.01 | -7.26 | -3.69 |
| 5  | GO:0000904 | GO Biological Processes | cell morphogenesis involved in differentiation                   | 6.41 | -7.19 | -3.69 |
| 6  | GO:0018108 | GO Biological Processes | peptidyl-tyrosine phosphorylation                                | 4.04 | -6.79 | -3.51 |
| 7  | GO:0098662 | GO Biological Processes | inorganic cation transmembrane transport                         | 6.27 | -6.55 | -3.46 |
| 8  | GO:0030155 | GO Biological Processes | regulation of cell adhesion                                      | 5.99 | -6.21 | -3.26 |
| 9  | GO:0043087 | GO Biological Processes | regulation of GTPase activity                                    | 4.46 | -5.96 | -3.04 |
| 10 | GO:0007416 | GO Biological Processes | synapse assembly                                                 | 2.51 | -5.86 | -2.99 |
| 11 | GO:0051129 | GO Biological Processes | negative regulation of cellular component organization           | 5.99 | -5.65 | -2.8  |
| 12 | GO:0048598 | GO Biological Processes | embryonic morphogenesis                                          | 5.01 | -5.54 | -2.71 |
| 13 | GO:0043062 | GO Biological Processes | extracellular structure organization                             | 4.18 | -5.49 | -2.7  |
| 14 | GO:0030036 | GO Biological Processes | actin cytoskeleton organization                                  | 5.57 | -5.49 | -2.7  |
| 15 | GO:0007626 | GO Biological Processes | locomotory behavior                                              | 2.51 | -5.38 | -2.66 |

|                |            |                         |                                                                 |          |                 |                 |
|----------------|------------|-------------------------|-----------------------------------------------------------------|----------|-----------------|-----------------|
| 16             | GO:0048729 | GO Biological Processes | tissue morphogenesis                                            | 5.29     | -5.31           | -2.62           |
| 17             | GO:0043009 | GO Biological Processes | chordate embryonic development                                  | 5.15     | -5.24           | -2.57           |
| 18             | GO:0050732 | GO Biological Processes | negative regulation of peptidyl-tyrosine phosphorylation        | 1.25     | -4.93           | -2.29           |
| 19             | GO:0010942 | GO Biological Processes | positive regulation of cell death                               | 5.57     | -4.91           | -2.28           |
| 20             | GO:1901137 | GO Biological Processes | carbohydrate derivative biosynthetic process                    | 5.71     | -4.88           | -2.27           |
| <b>Introns</b> | <b>GO</b>  | <b>Category</b>         | <b>Description</b>                                              | <b>%</b> | <b>Log10(P)</b> | <b>Log10(q)</b> |
| 1              | GO:0007156 | GO Biological Processes | homophilic cell adhesion via plasma membrane adhesion molecules | 4.49     | -30.15          | -25.95          |
| 2              | GO:0120039 | GO Biological Processes | plasma membrane bounded cell projection morphogenesis           | 7.25     | -18.46          | -14.74          |
| 3              | GO:0050808 | GO Biological Processes | synapse organization                                            | 5.18     | -15.64          | -12.34          |
| 4              | GO:0050804 | GO Biological Processes | modulation of chemical synaptic transmission                    | 4.92     | -13.01          | -9.81           |
| 5              | GO:0007423 | GO Biological Processes | sensory organ development                                       | 5.26     | -10.59          | -7.74           |
| 6              | GO:0007420 | GO Biological Processes | brain development                                               | 6.13     | -9.76           | -6.94           |
| 7              | GO:0007264 | GO Biological Processes | small GTPase mediated signal transduction                       | 4.66     | -9.5            | -6.71           |
| 8              | GO:0016358 | GO Biological Processes | dendrite development                                            | 2.93     | -9.06           | -6.3            |
| 9              | GO:0007610 | GO Biological Processes | behavior                                                        | 5        | -8.41           | -5.66           |

|    |            |                         |                                                                         |      |       |       |
|----|------------|-------------------------|-------------------------------------------------------------------------|------|-------|-------|
| 10 | GO:0044057 | GO Biological Processes | regulation of system process                                            | 5.09 | -8.37 | -5.65 |
| 11 | GO:0043087 | GO Biological Processes | regulation of GTPase activity                                           | 4.23 | -8.12 | -5.42 |
| 12 | GO:0098662 | GO Biological Processes | inorganic cation transmembrane transport                                | 5.78 | -8.08 | -5.39 |
| 13 | GO:0007169 | GO Biological Processes | transmembrane receptor protein tyrosine kinase signaling pathway        | 5.61 | -7.66 | -5    |
| 14 | GO:0030036 | GO Biological Processes | actin cytoskeleton organization                                         | 5.35 | -7.56 | -4.91 |
| 15 | GO:1905114 | GO Biological Processes | cell surface receptor signaling pathway involved in cell-cell signaling | 4.83 | -7.18 | -4.57 |
| 16 | GO:0010817 | GO Biological Processes | regulation of hormone levels                                            | 4.4  | -7.1  | -4.51 |
| 17 | GO:0048598 | GO Biological Processes | embryonic morphogenesis                                                 | 4.57 | -6.63 | -4.1  |
| 18 | GO:0034762 | GO Biological Processes | regulation of transmembrane transport                                   | 4.4  | -6.45 | -3.94 |
| 19 | GO:0032870 | GO Biological Processes | cellular response to hormone stimulus                                   | 4.92 | -6.38 | -3.88 |
| 20 | GO:0042733 | GO Biological Processes | embryonic digit morphogenesis                                           | 1.12 | -5.99 | -3.54 |
